# Supplementary material
Source: PubMed Central journal article supplement (PMC4331000)
Supplement: embj0034-0448-sd7.pdf [file embj0034-0448-sd7.pdf]

**(Phospho-Tyrosine aa 120)**  
**Peptide Sequence:(aa 110)-LSATDDDSGDpYAPMDR-(aa 125)**

**β, ions** 114.09 201.12 272.16 373.20 488.23 603.26 718.28 805.32 862.34 977.36 1220.39 1291.43 1388.48 1535.52 1650.55 -  
**L S A T D D D S G D Y\* A P M D R**  
 - 1711.57 1624.54 1553.50 1452.46 1337.43 1222.40 1107.38 1020.34 963.32 848.30 605.27 534.23 437.18 290.14 175.11 **γ, ions**

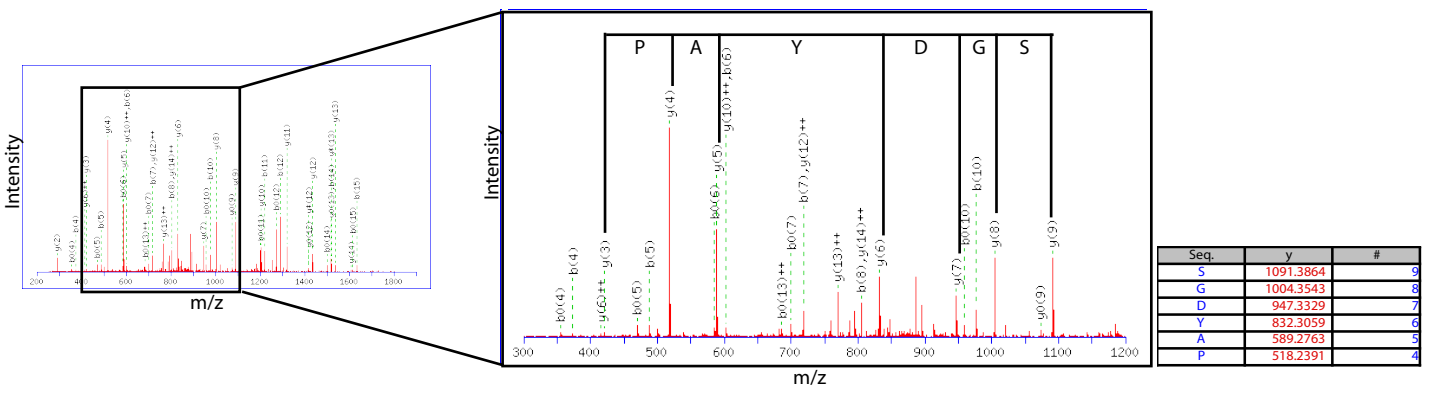

**(Phosphotyrosine aa 85)**  
**Peptide Sequence:(aa 61)-TSYIYDVPTVPTSKPWHLMDNSLpYATPR-(aa 89) (29mer)**

**β, ions** 102.05 189.08 352.15 465.23 628.29 743.32 842.39 939.44 1120.45 1219.52 1316.58 1417.62 1504.66 1632.75  
**T S Y I Y D V P T V P T S K**  
 - 3448.54 3361.51 3198.45 3085.36 2922.30 2807.27 2708.20 2611.15 2430.14 2331.07 2234.02 2132.97 2045.94

1729.80 1915.88 2052.94 2166.03 2297.07 2434.13 2549.15 2663.20 2750.23 2863.31 3106.34 3177.38 3278.43 3375.48 -  
**P W H L M H D N S L Y\* A T P R**  
 1917.84 1802.79 1634.71 1497.65 1384.57 1253.53 1116.47 1001.44 887.40 800.37 687.28 444.25 373.21 272.17 175.11 **γ, ions**

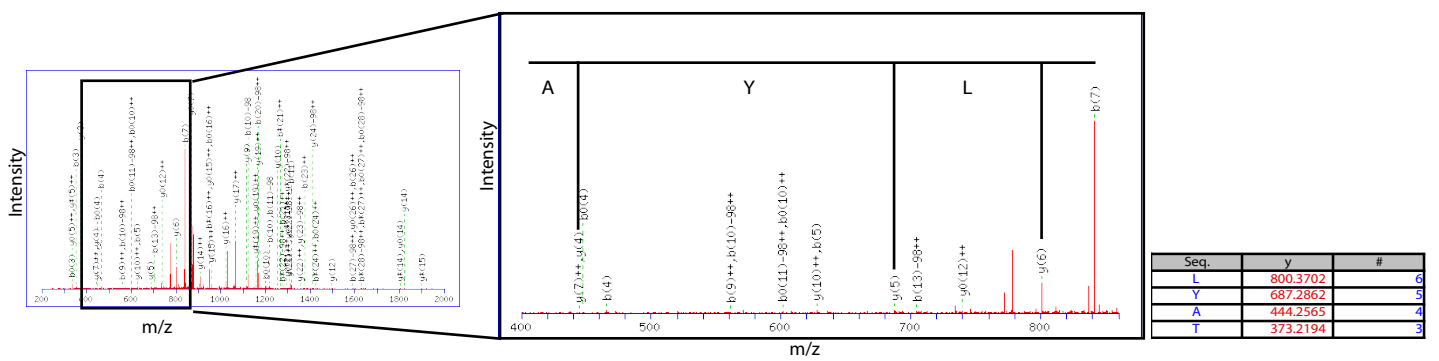

**(Phosphotyrosine aa 65)**  
**Peptide Sequence: (aa 61)-TSYIpYDVPTVPTSKPWHLMDNSLYATPR-(aa 89) (29mer)**

**β, ions** 102.05 189.08 352.15 465.23 708.26 823.29 922.35 1019.41 1120.45 1219.52 1316.58 1417.62 1504.66 1632.75 1729.80  
**T S Y I Y\* D V P T V P T S K P**  
 - 3368.58 3281.54 3118.48 3005.40 2762.37 2647.34 2548.27 2451.22 2350.17 2251.10 2154.05 2053.00 1965.97 1837.88

1915.88 2052.94 2166.03 2297.07 2434.13 2549.15 2663.20 2750.23 2863.31 3026.37 3097.41 3198.46 3295.51 -  
**W H L M H D N S L Y A T P R**  
 1740.82 1554.74 1417.68 1304.60 1173.56 1036.50 921.47 807.43 720.40 607.31 444.25 373.21 272.17 175.11 **γ, ions**

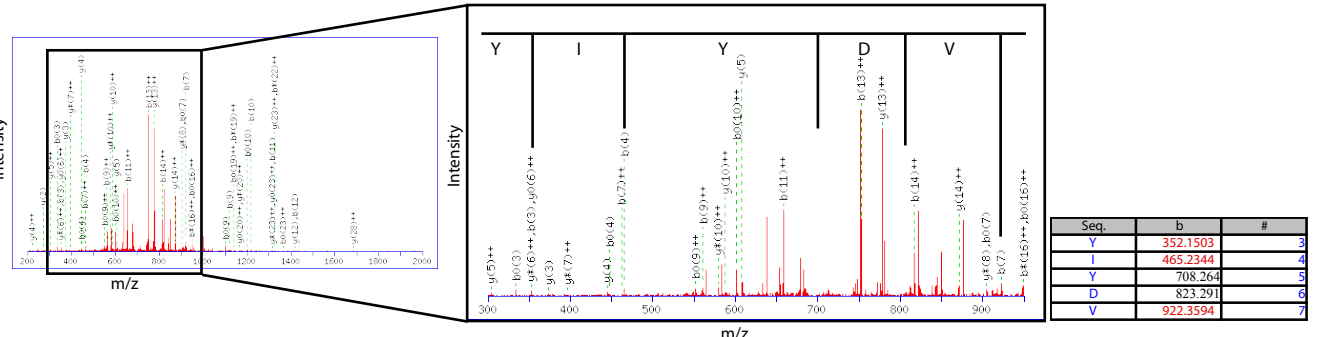

Fig. S7\_Gill et al., 2014
