# Supplementary material
Source: PubMed Central journal article supplement (PMC4331000)
Supplement: embj0034-0448-sd11.pdf [file embj0034-0448-sd11.pdf]

## Supplementary Figures

### Figure S1

**A.** Immunofluorescence images showing the localization of GFP and GFP-KSHV-TK in COS and BHK cells. **B.** GFP-HSV1-TK does not induce cell contraction or loss of phospho-tyrosine and phospho-paxillin Y31 epitopes from focal adhesions. **C.** Transmission electron micrographs of HeLa cells expressing GFP or GFP-KSHV-TK. **D.** Treatment of HeLa cells with the cell-permeable caspase inhibitor, Z-VAD-FMK does not inhibit GFP-KSHV-TK induced cell contraction. **E.** GFP-KSHV-TK but not GFP induces the formation of actin stress fibres and cell rounding. Quantification of GFP-KSHV-TK induced cell contraction. The graph shows the percentage of cells with flattened morphology (Flat), flattened morphology with central actin stress fibers (Flat + SF), and rounded morphology calculated from 3 independent experiments in which n= 215 for GFP and n= 218 for GFP-KSHV-TK. Scale bars = 20  $\mu$ m.

### Figure S2

**A.** Immunofluorescence images showing that Y-27632 and Blebbistatin treatment does not induce cell contraction or loss of phosphotyrosine, phospho-FAK-Y397, Y925 and phospho-paxillin-Y31 epitopes from focal adhesions. **B.** GFP-KSHV-TK but not GFP leads to a loss of the phospho-FAK Y397/Y861 and phospho-Paxillin Y118 signals at focal adhesions. **C.** The graphs represent the total cell fluorescence when staining for phospho-Paxillin Y31 or phospho-FAKY925 in cells expressing GFP or GFP-KSHV-TK. Only transfected cells were quantified. The error bars represent SEM from 3 independent experiments in which n= 123 for GFP and n= 126 for GFP-KSHV-TK when staining for phospho-Paxillin Y31 and phospho-FAKY925. Immunoblot analysis showing that GFP-KSHV-TK but not GFP leads to reduced Paxillin-Y31 and FAK-Y925 phosphorylation. Scale bars = 20  $\mu$ m.

### Figure S3

**A.** GFP-KSHV-TK induces the loss of FAK, Paxillin and Zyxin from focal adhesions. White arrowheads indicate cells expressing GFP-KSHV-TK. **B.** Expression of GFP-KSHV-TK but not GFP leads to a loss of Parvin, VASP and Vinculin from focal adhesions. **C.** Expression of untagged KSHV-TK or RFP-KSHV-TK induces the loss of GFP-FAK from focal adhesions. Scale bars = 20  $\mu\text{m}$ .

### Figure S4

**A.** HeLa cells infected with MuHV-4 or MuHV-4 [g-KSHV-TK] labelled with the indicated antibodies reveals that both viruses express early and late lytic proteins. **B.** Immunofluorescence analysis of phosphotyrosine staining in HeLa cells infected with KSHV-lyt in the presence of absence of Y-27632. Scale bars= 20  $\mu\text{m}$ .

### Figure S5

GFP-KSHV-TK-DEAD does not induce loss of paxillin, phospho-paxillin (Y118), Parvin, VASP or Vinculin from focal adhesions. Scale bars = 20  $\mu\text{m}$ .

### Figure S6

**A.** Immunoblot analysis of Y to F mutants demonstrates that Y65 and Y85 of KSHV are phosphorylated. **B.** Immunofluorescence images showing that the Y2F mutant does not induce cell contraction or loss of phosphotyrosine epitopes from focal adhesions. **C.** Immunofluorescence images showing that the Y2F mutant does not induce loss of phospho-Paxillin Y31 or phospho-FAK Y925 epitopes from focal adhesions. **D.** Expression of GFP-KSHV-TK but not GFP induces contraction of zyxin labelled FAK<sup>+/+</sup> cells. Scale bars = 20  $\mu\text{m}$ .

## **Figure S7**

Partially purified GST-KSHV-TK fractionated and analysed by LC-MS/MS to map phosphorylated peptides. KSHV-TK showing auto-phosphorylation of tyrosine residues 65, 85 and 120. The identity of each peptide and phosphorylation sites is shown in the manual interpretation of the spectra.

## **Supplementary Movies**

**Movie S1.** The movie shows GFP-KSHV-TK (top panel) induced contraction of a HeLa cell in phase contrast (bottom panel) over a period of 2140s. The movie starts 16 hours after the cell was first transfected with GFP-KSHV-TK.

**Movie S2.** The movie shows that GFP (top panel) does not induce contraction of HeLa cells in phase contrast (bottom panel) over a 1138s. The movie starts 16 hours after the cells were first transfected with GFP.

**Movie S3.** A phase contrast movie of a HeLa cell undergoing GFP-KSHV-TK induced contraction and blebbing over a period of 620s. The movie starts 18 hours after the cells were first transfected with GFP-KSHV-TK.
