# Supplementary material
Source: PubMed Central journal article supplement (PMC4331000)

# Uncropped Figure 7B

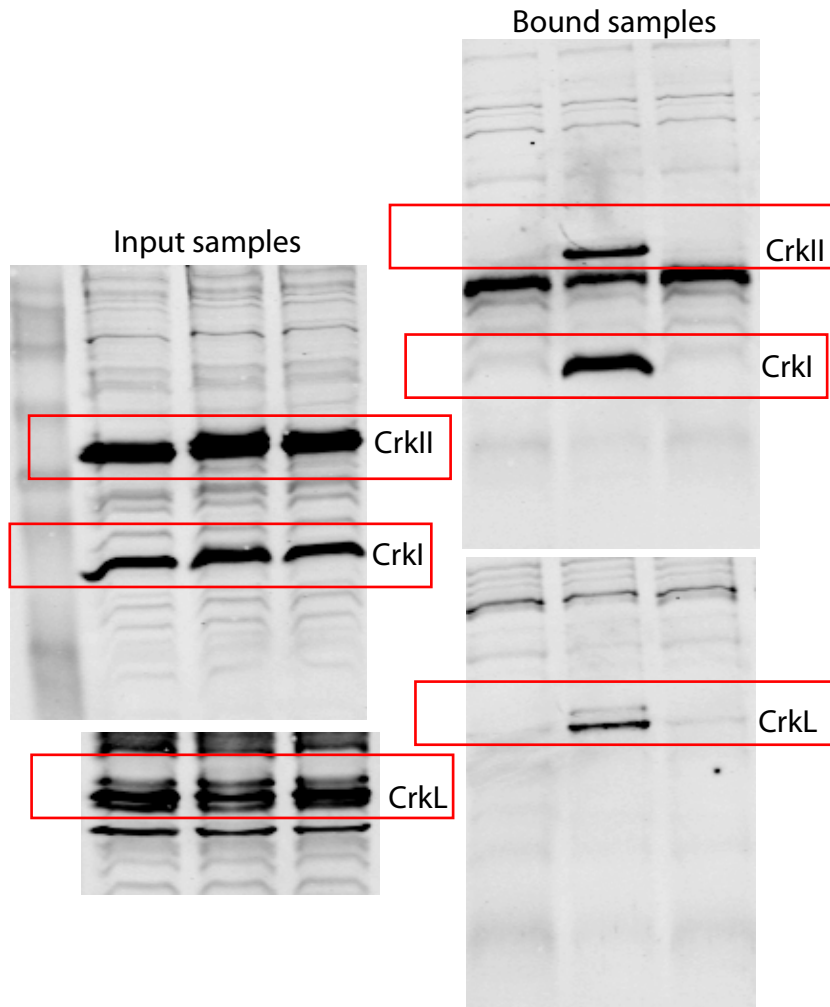

(GFP\_bound and IP as shown in original figure)

## LHS panel

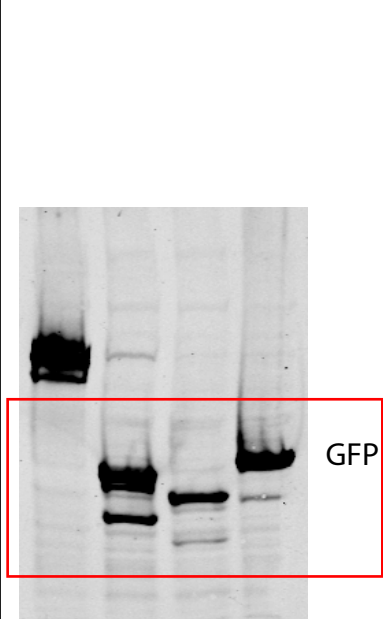

# Uncropped Figure 7D

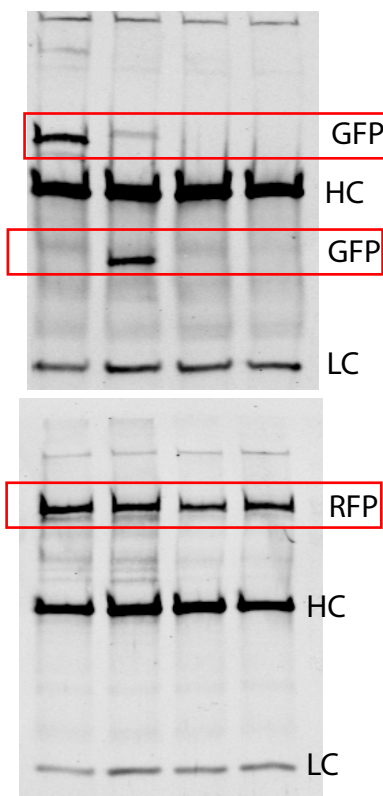

## Input samples

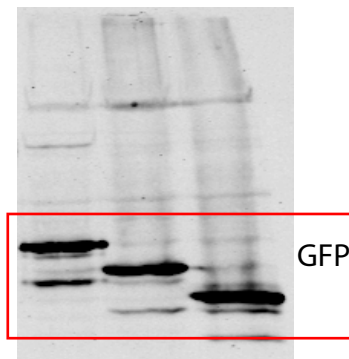

## RHS panel

### Bound samples

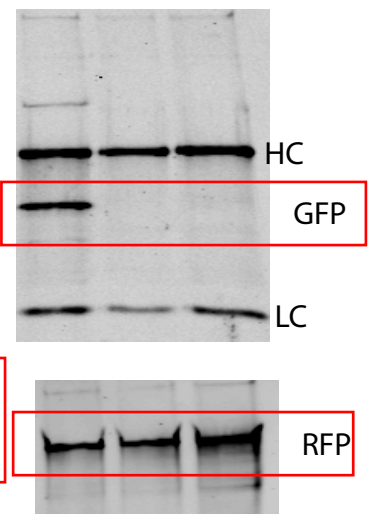

Supplement: embj0034-0448-sd14.pdf [file embj0034-0448-sd14.pdf]
