# Supplementary material
Source: PubMed Central journal article supplement (PMC4331000)

## Uncropped Figure 8B

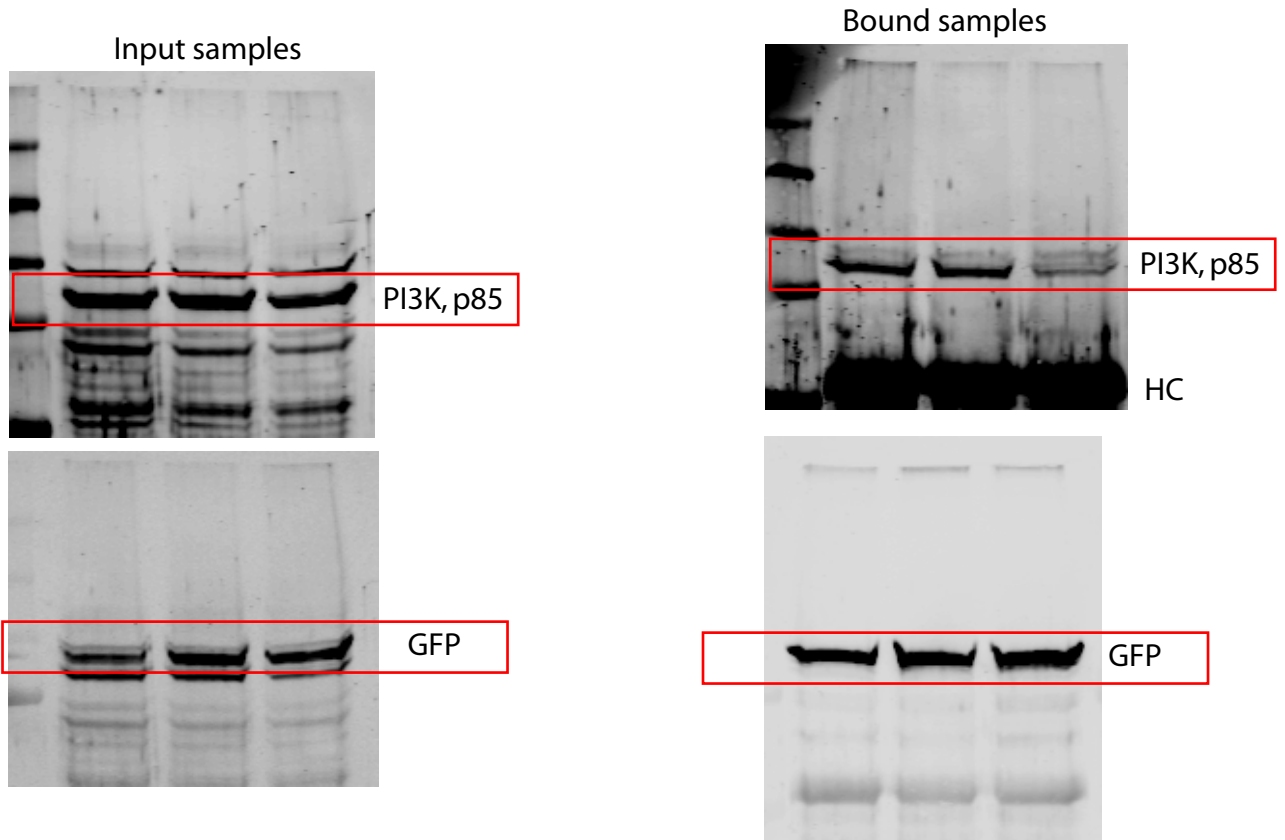

## Uncropped Figure 8C

Bound samples

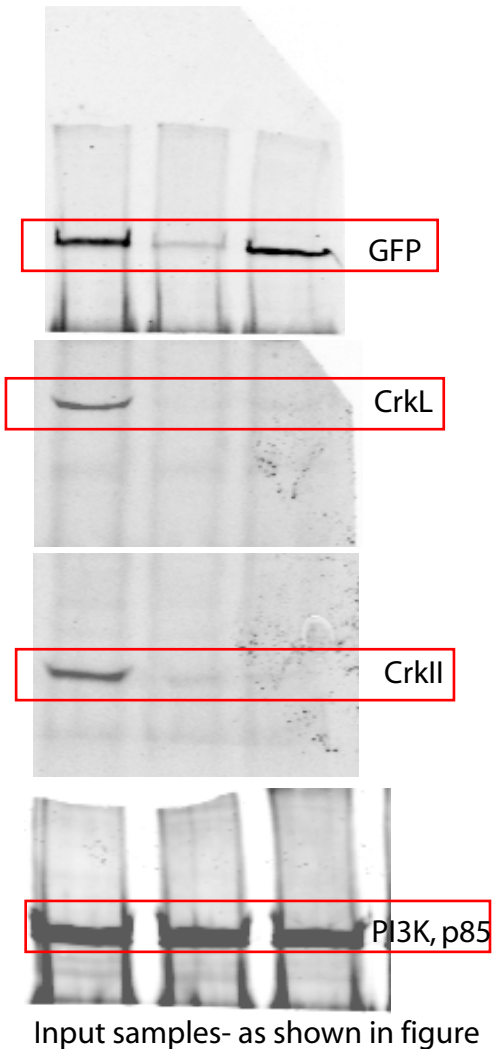

## Uncropped Figure 8D

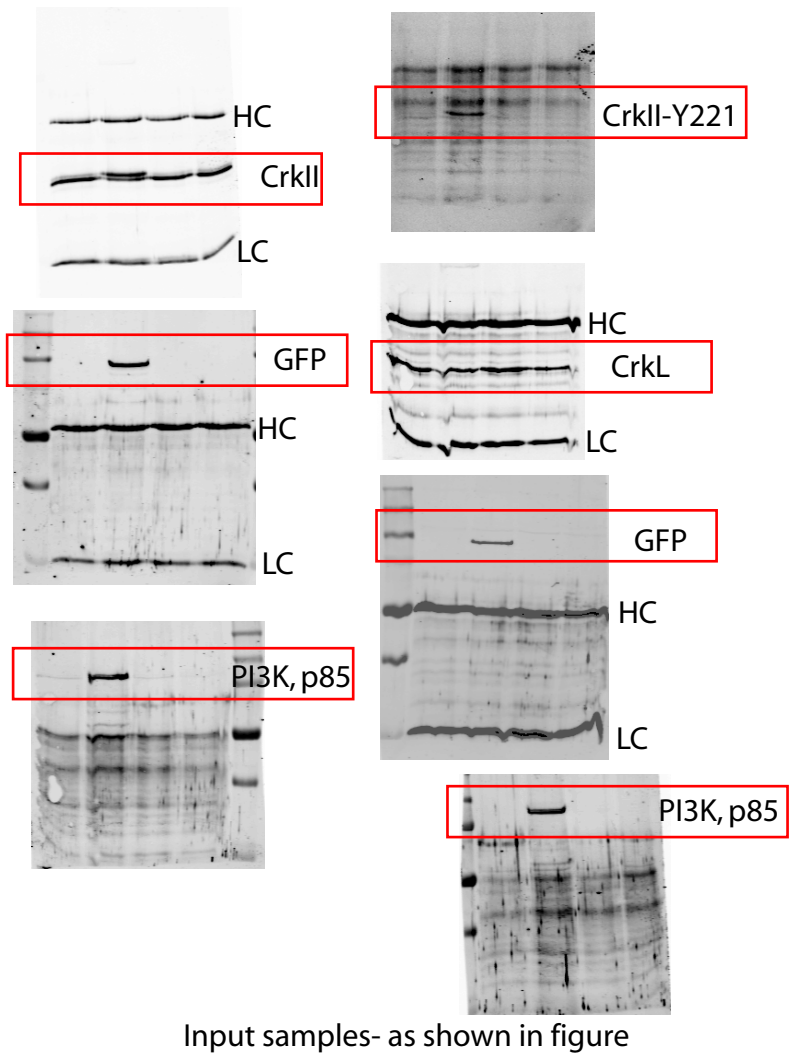

## Uncropped Figure 8E

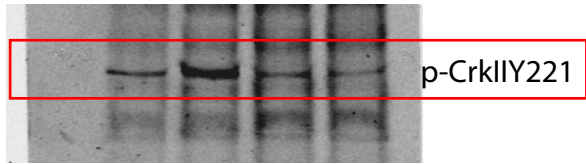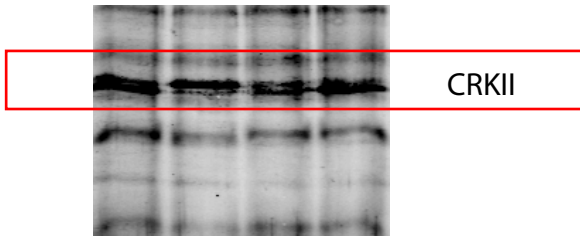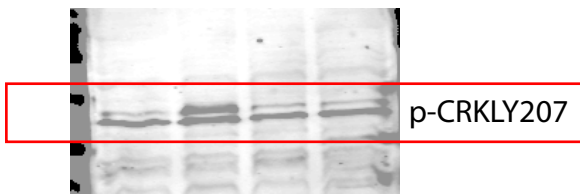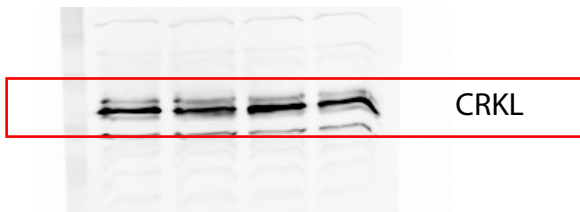

## Uncropped Figure 8F

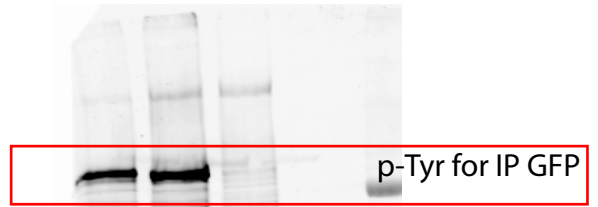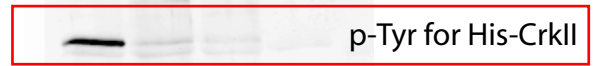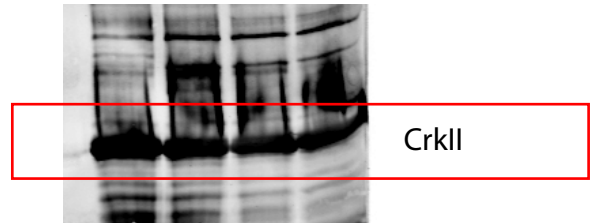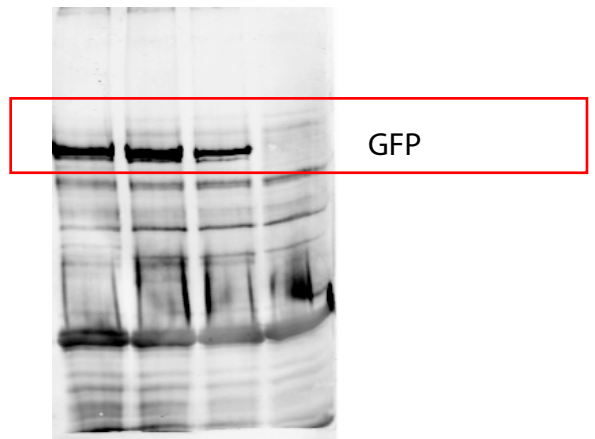

Supplement: embj0034-0448-sd15.pdf [file embj0034-0448-sd15.pdf]
