# Supplementary material
Source: PubMed Central journal article supplement (PMC4331000)

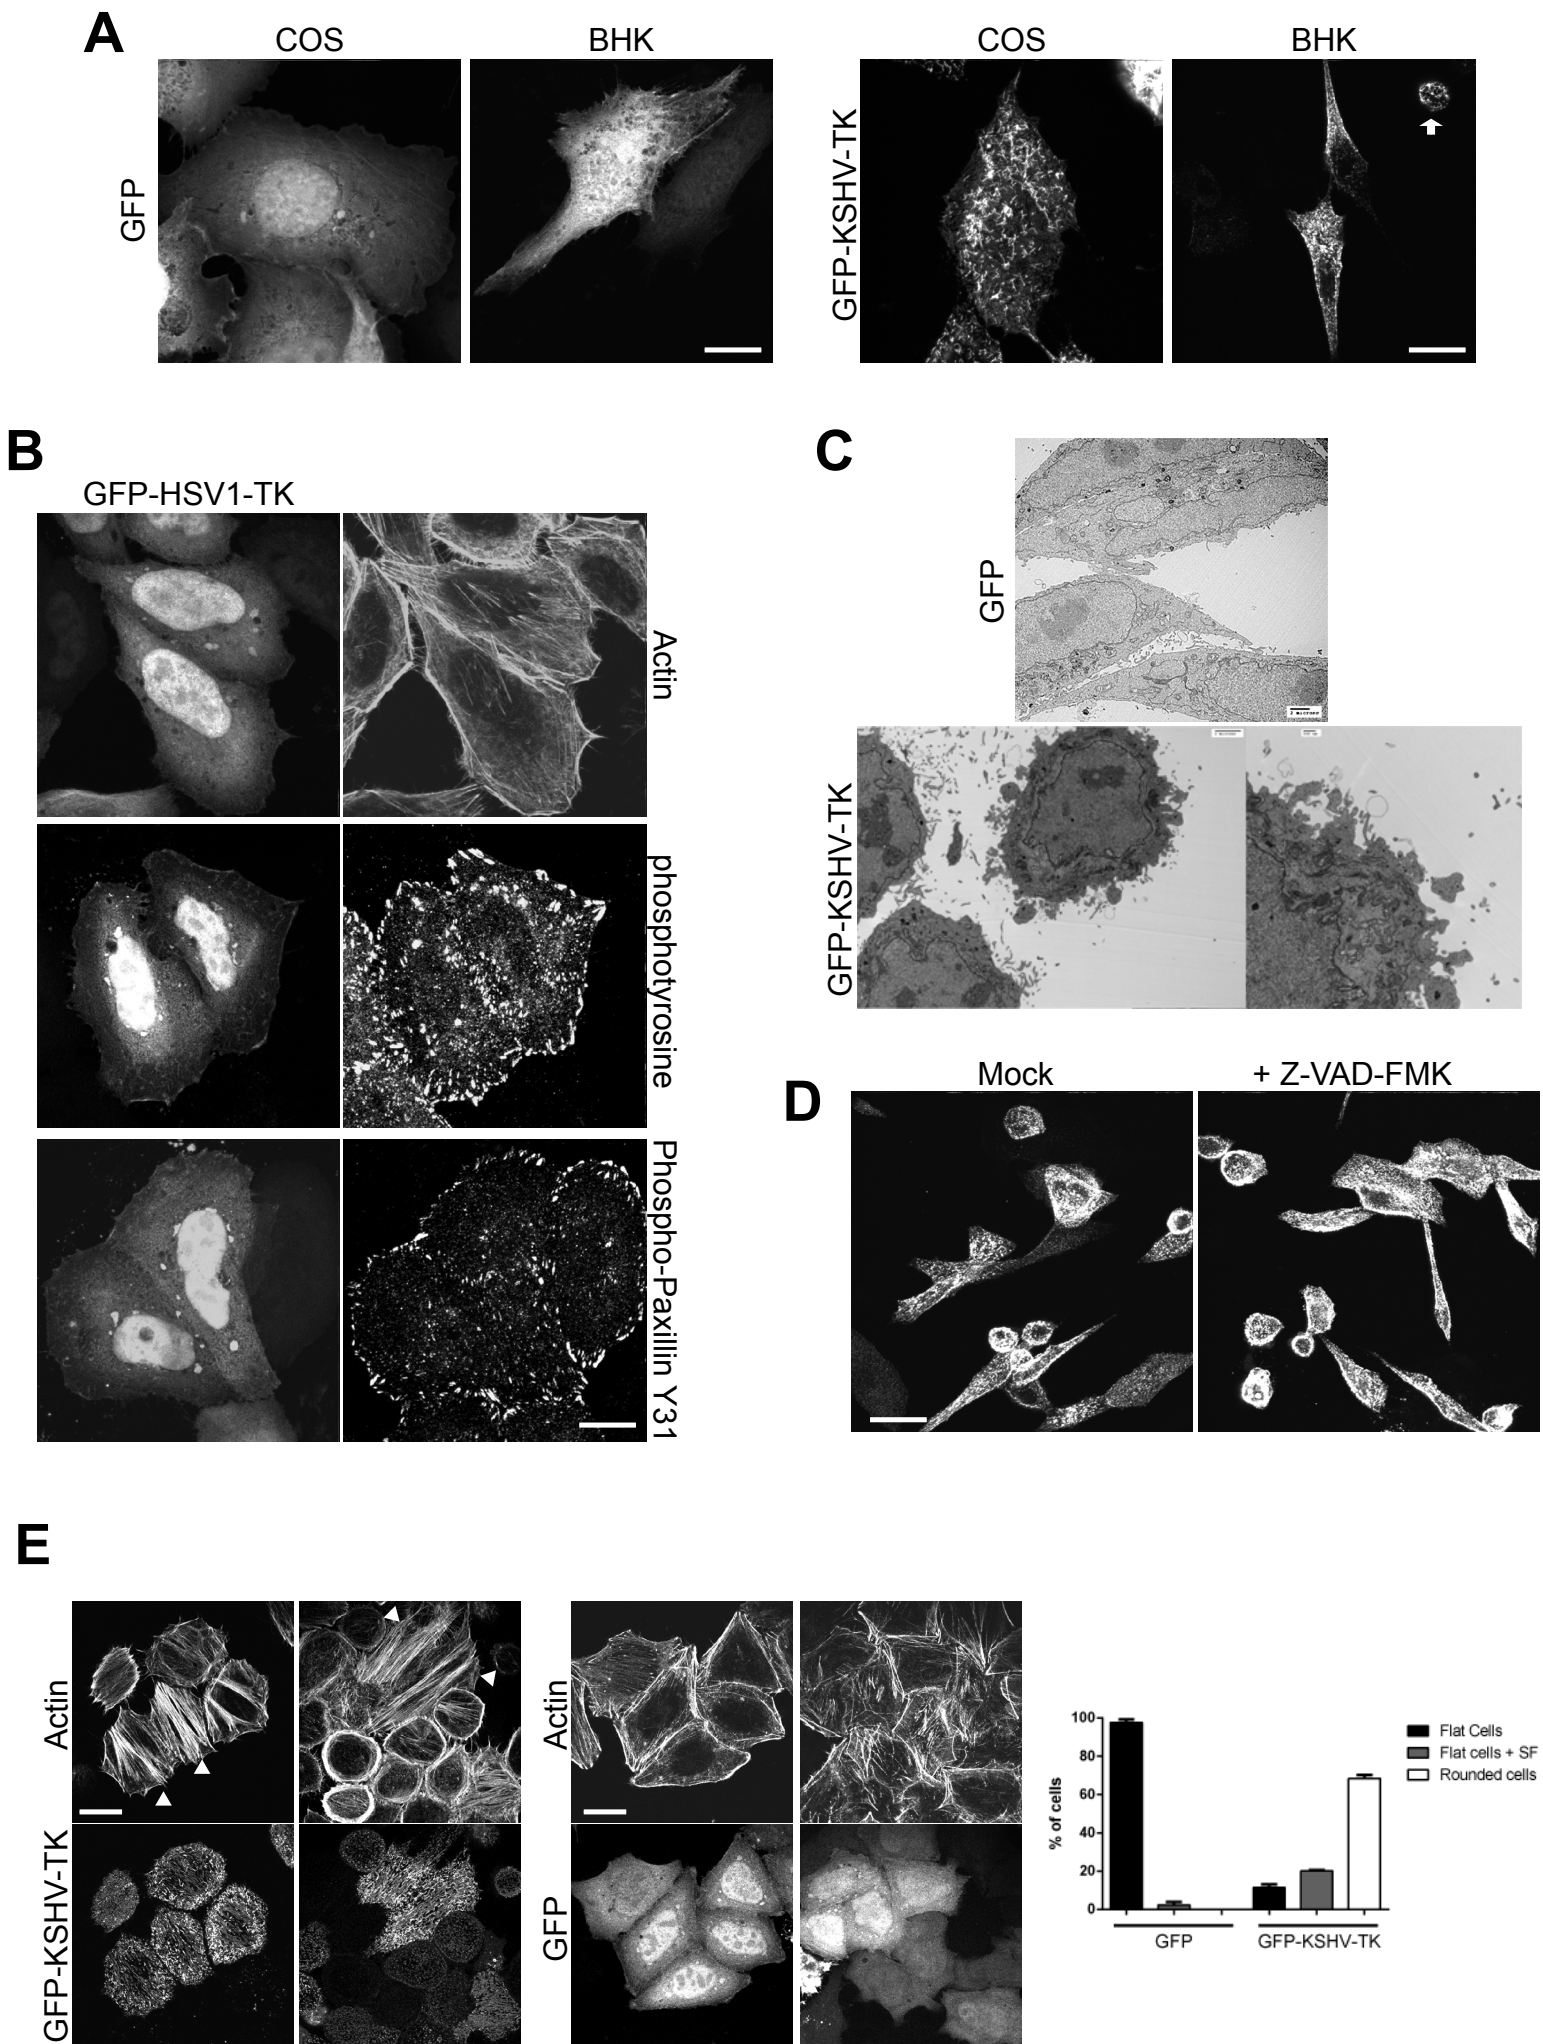

Figure\_S1 Gill et al., 2014

Supplement: embj0034-0448-sd1.pdf [file embj0034-0448-sd1.pdf]

### Uncropped Figure 6C

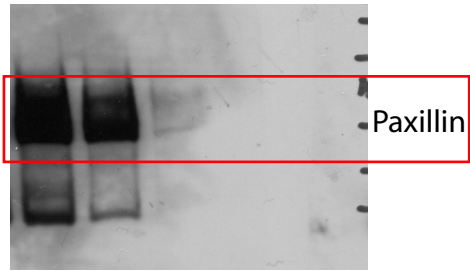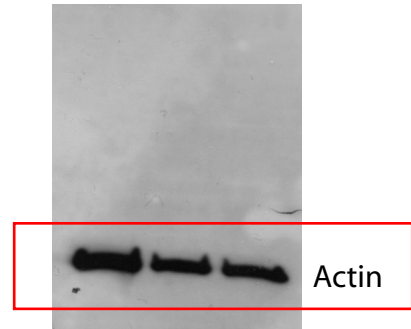

Supplement: embj0034-0448-sd13.pdf [file embj0034-0448-sd13.pdf]

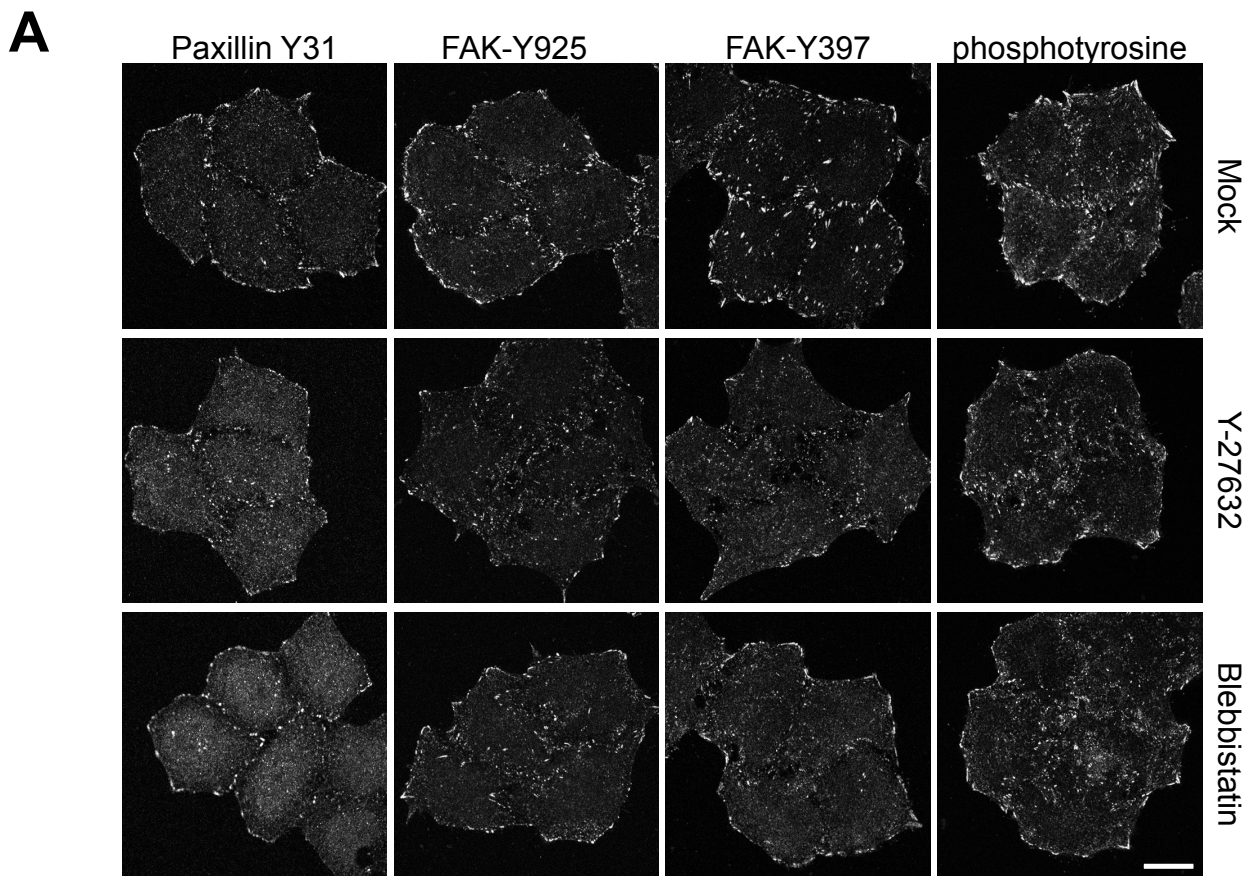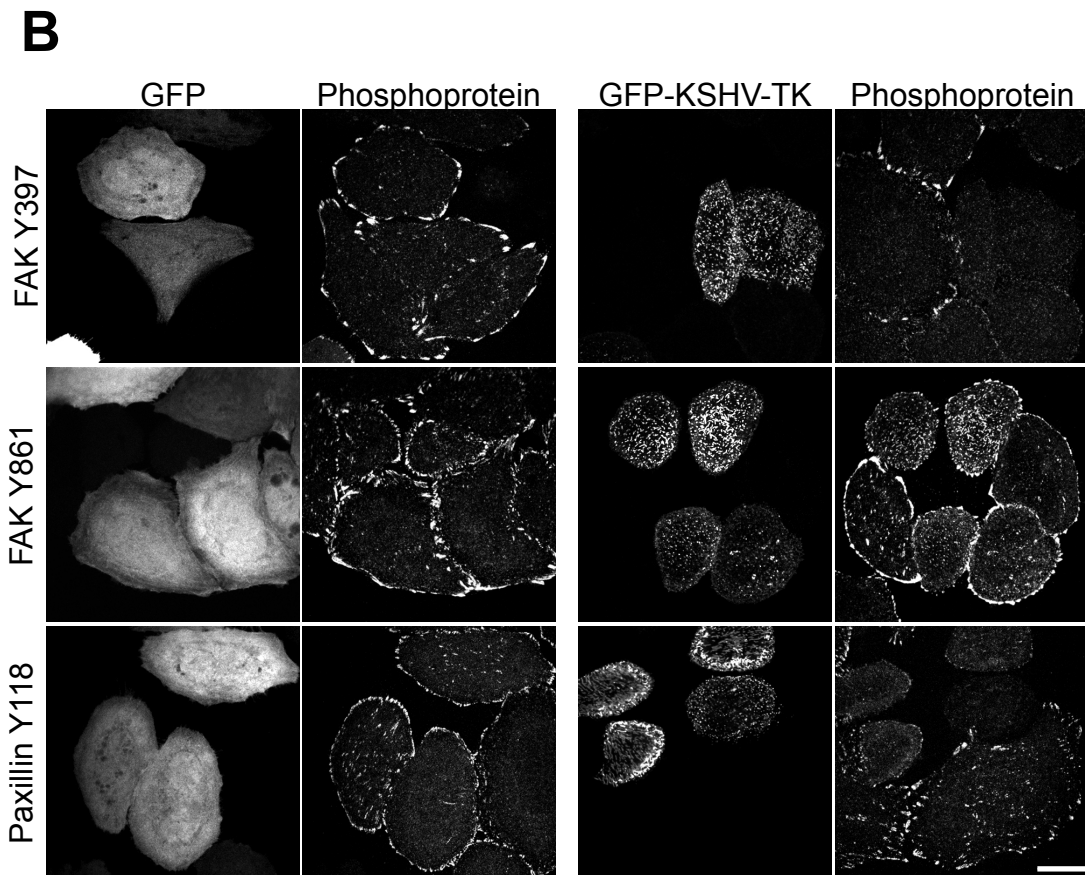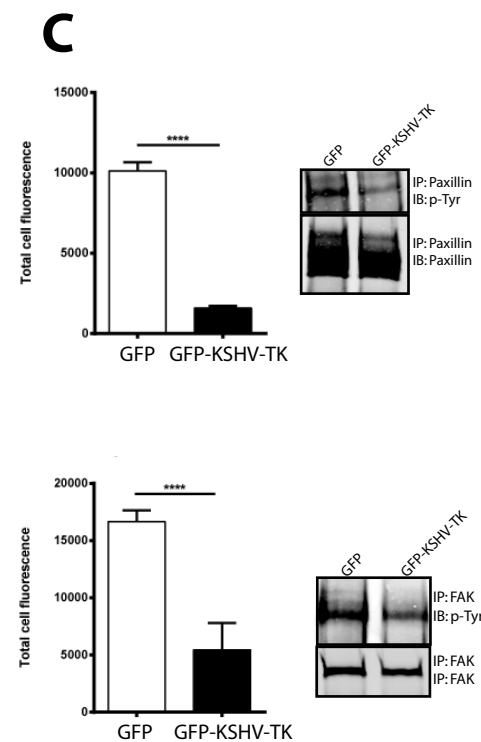

Supplement: embj0034-0448-sd2.pdf [file embj0034-0448-sd2.pdf]

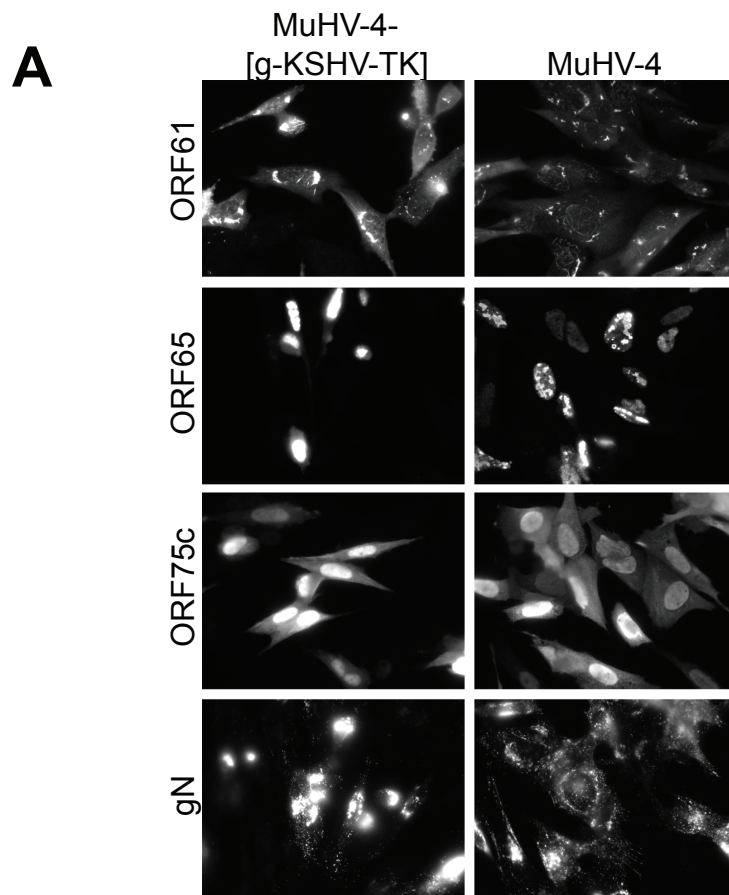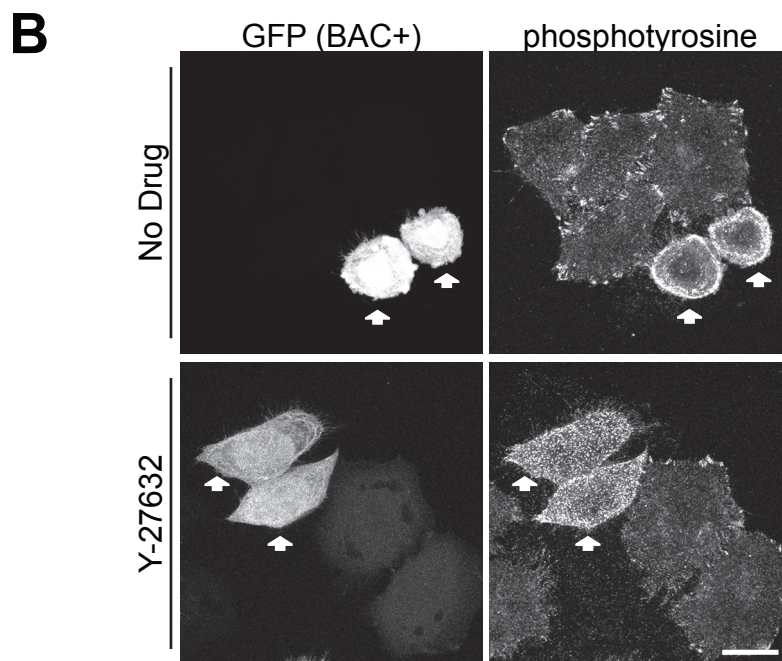

Supplement: embj0034-0448-sd4.pdf [file embj0034-0448-sd4.pdf]

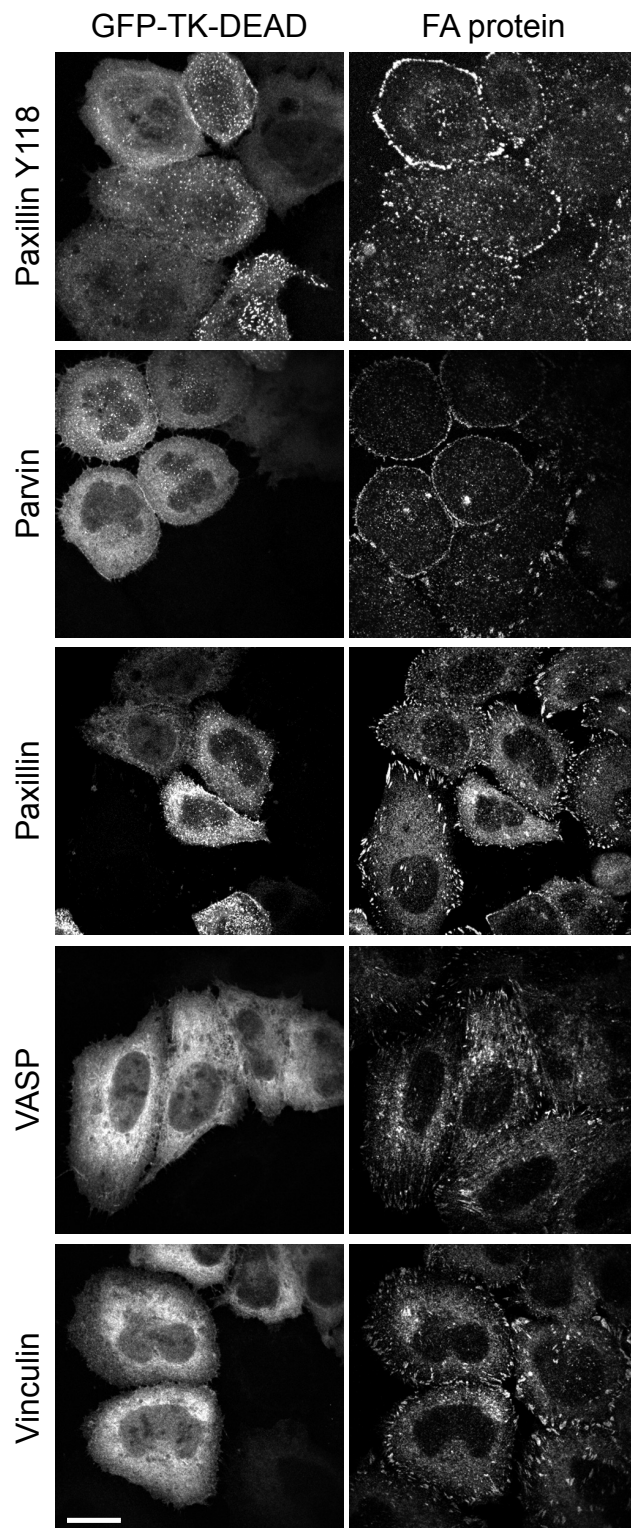

Figure S5\_Gill et al., 2014

Supplement: embj0034-0448-sd5.pdf [file embj0034-0448-sd5.pdf]

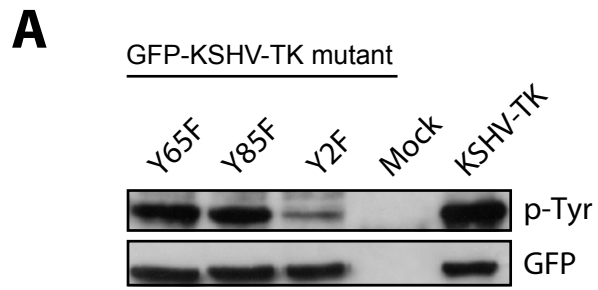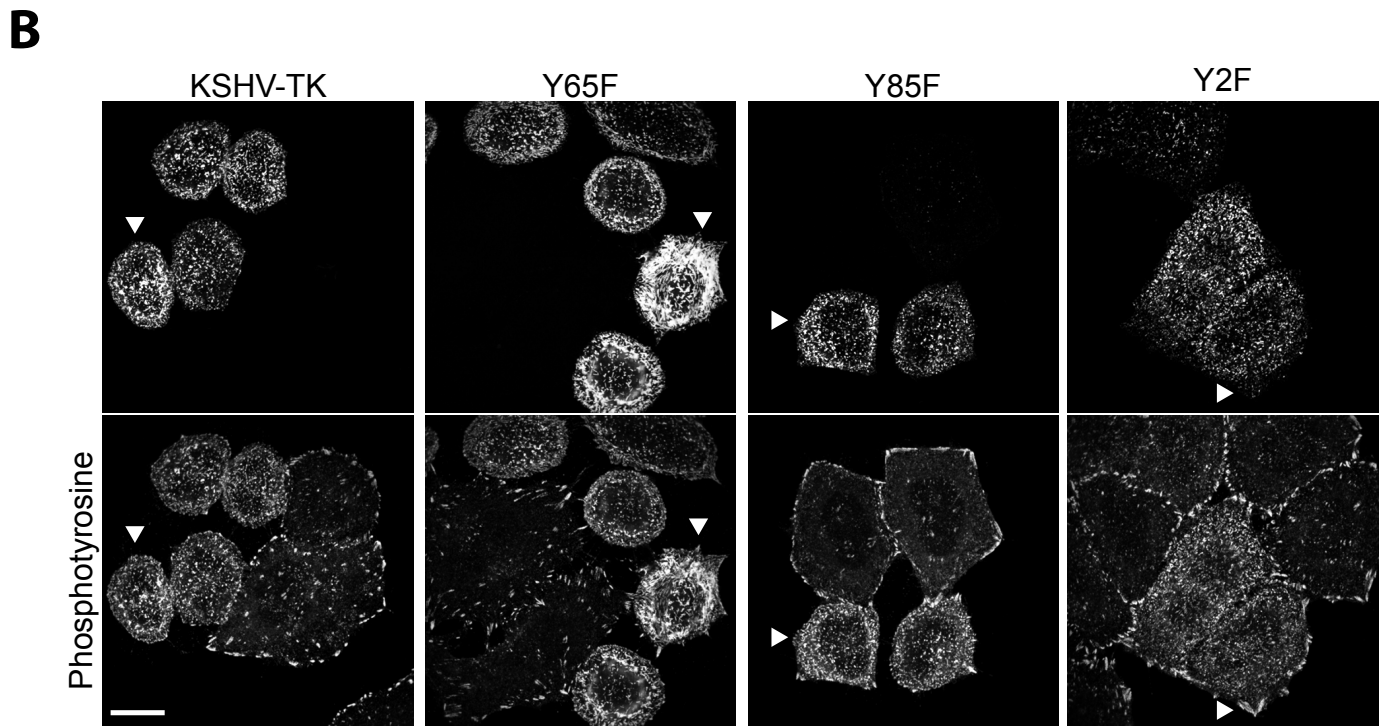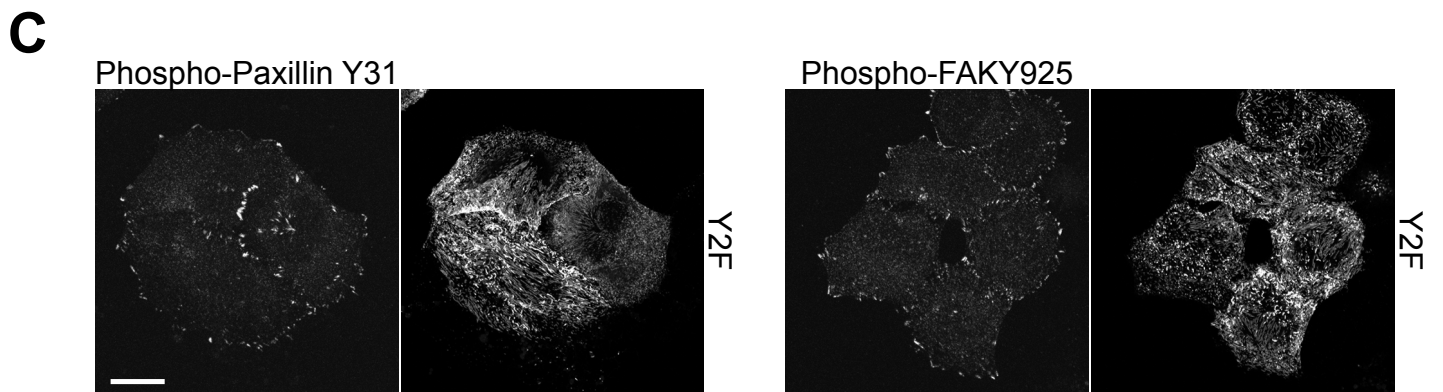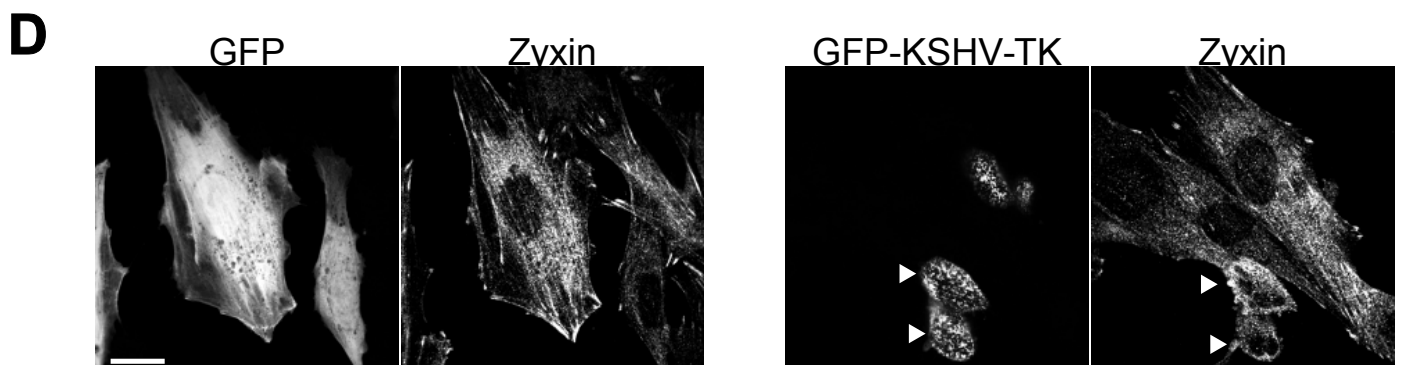

Supplement: embj0034-0448-sd6.pdf [file embj0034-0448-sd6.pdf]
